# Supplementary material for: Role of SPAK-NKCC1 Signaling Cascade in the Choroid Plexus Blood-CSF Barrier Damage After Stroke
Source: Research Square preprint supplement (doi:10.21203/rs.3.rs-1189368/v1), 2021-12-29
Supplement: Supplementary file 1 [file 512b38da34e3f13525869a37.pdf]

# **Role of SPAK-NKCC1 signaling cascade in the choroid plexus blood-CSF barrier damage after stroke**

Jun Wang<sup>1, 2</sup>, Ruijia Liu<sup>2</sup>, Md Nabiul Hasan<sup>2</sup>, Sydney Fischer<sup>2</sup>, Matt Como<sup>3</sup>, Victoria M Fiesler<sup>2</sup>, Gulnaz Begum<sup>2</sup>, Yang Chen<sup>1, 2</sup>, Mohammad Iqbal H. Bhuiyan<sup>2</sup>, Shuying Dong<sup>2</sup>, Eric Li<sup>2</sup>, Kristopher T Kahle<sup>4</sup>, Jinwei Zhang<sup>5</sup>, Xianming Deng<sup>6</sup>, Arohan R Subramanya<sup>7, 8</sup>, Yan Yin<sup>1\*</sup>, Dandan Sun<sup>2, 8\*</sup>

<sup>1</sup>Department of Neurology, The Second Hospital of Dalian Medical University, Dalian, Liaoning, China

<sup>2</sup>Department of Neurology, University of Pittsburgh, Pittsburgh, PA, USA

<sup>3</sup>Pennsylvania State University, State College, PA, USA.

<sup>4</sup>Department of Neurosurgery, The Massachusetts General Hospital and Harvard Medical School, Boston, MA, USA

<sup>5</sup>Institute of Biomedical and Clinical Sciences, Medical School, College of Medicine and Health, University of Exeter, Hatherly Laboratory, Exeter, EX4 4PS, UK

<sup>6</sup>State Key Laboratory of Cellular Stress Biology, Innovation Center for Cell Signaling Network, School of Life Sciences, Xiamen University, Xiamen, Fujian, China

<sup>7</sup>Department of Medicine, Renal-Electrolyte Division, University of Pittsburgh School of Medicine, Pittsburgh, PA, USA

<sup>8</sup> Research Service, Veterans Affairs Pittsburgh Health Care System, Pittsburgh, PA, USA

**Running title: SPAK-NKCC1 complex in the blood-CSF barrier**

## **\*Address correspondence to:**

Dandan Sun, M.D., Ph.D.  
Department of Neurology  
University of Pittsburgh  
7016 Biomedical Science Tower 3, 3501 Fifth Ave.  
Pittsburgh, PA 15260  
Tel: (412) 624-0418, Fax: (412) 648-3321  
E-mail address: [sund@upmc.edu](mailto:sund@upmc.edu)

Yan Yin, M.D., Ph.D.  
Department of Neurology  
The Second Hospital of Dalian Medical University  
Dalian, Liaoning, China 116027  
E-mail address: [yanyin1208@126.com](mailto:yanyin1208@126.com)

**Supplementary Table 1. List of antibodies used for immunofluorescence (IF), western blot (WB) and flow cytometry (Flow).**

| <b>Antibody</b>  | <b>Host</b>      | <b>Dilution</b> | <b>Company</b>            | <b>Catalog No.</b> | <b>Application</b> |
|------------------|------------------|-----------------|---------------------------|--------------------|--------------------|
| SPAK             | Rabbit           | 1:200           | Cell Signaling Technology | 2281               | IF                 |
| pSPAK            | Rabbit           | 1:200           | EMD Millipore             | 07-2273            |                    |
| NKCC1            | Rabbit           | 1:200           | Abcam                     | ab59791            |                    |
| pNKCC1           | Rabbit           | 1:200           | EMD Millipore             | ABS1004            |                    |
| pT58 NCC         | Rabbit           | 1:500           | N/A                       | N/A                |                    |
| (pThr211 NKCC1)  | Rabbit           | 1:200           | Wako Bioproducts          | 019-19741          |                    |
| Iba1             |                  |                 |                           |                    |                    |
| ZO-1             | Rabbit           | 1:200           | Invitrogen                | 40-2200            |                    |
| Claudin-1        | Rabbit           | 1:200           | Invitrogen                | 51-9000            |                    |
| Claudin-5        | Mouse            | 1:200           | Invitrogen                | 35-2500            |                    |
| Cytokeratin      | Mouse            | 1:200           | Sigma                     | C2562              |                    |
| MAP2             | Mouse            | 1:200           | EMD Millipore             | MAB3418            |                    |
| CD8              | Rat              | 1:100           | Invitrogen                | 14-0081-82         |                    |
| SPAK/OSR1        | Rabbit           | 1:300           | N/A                       | N/A                | WB                 |
| pSPAK/pOSR1      | Rabbit           | 1:300           | N/A                       | N/A                |                    |
| NKCC1 (T4)       | Mouse            | 1:3000          | DSHB                      | T4                 |                    |
| pNKCC1           | Rabbit           | 1:300           | N/A                       | N/A                |                    |
| pNF-κB p65       | Rabbit           | 1:500           | Cell Signaling Technology | 3031S              |                    |
| NF-κB p65        | Rabbit           | 1:1000          | Santa Cruz                | SC-372             |                    |
| MMP9             | Rabbit           | 1:500           | Abcam                     | ab283575           | Flow               |
| GAPDH            | Rabbit           | 1:5000          | Cell Signaling Technology | 2118S              |                    |
| β-actin          | Rabbit           | 1:5000          | Cell Signaling Technology | 4970S              |                    |
| BUV395-CD11b     | Rat              | 250             | BD Biosciences            | 56353              |                    |
| APC-CD45         | Rat              | 250             | BioLegend                 | 103111             |                    |
| PerCP/Cy5.5-Ly6G | Rat              | 250             | BioLegend                 | 127615             |                    |
| PE-Cy7-Ly-6C     | Rat              | 250             | BD Biosciences            | 560593             |                    |
| BV421-CD3        | Armenian Hamster | 250             | BioLegend                 | 100336             |                    |
| FITC-CD206       | Rat              | 250             | BioLegend                 | 141704             |                    |
| PE-Ym-1          | Rabbit           | 2500            | Abcam                     | Ab211621           |                    |

## Supplementary Figure 1

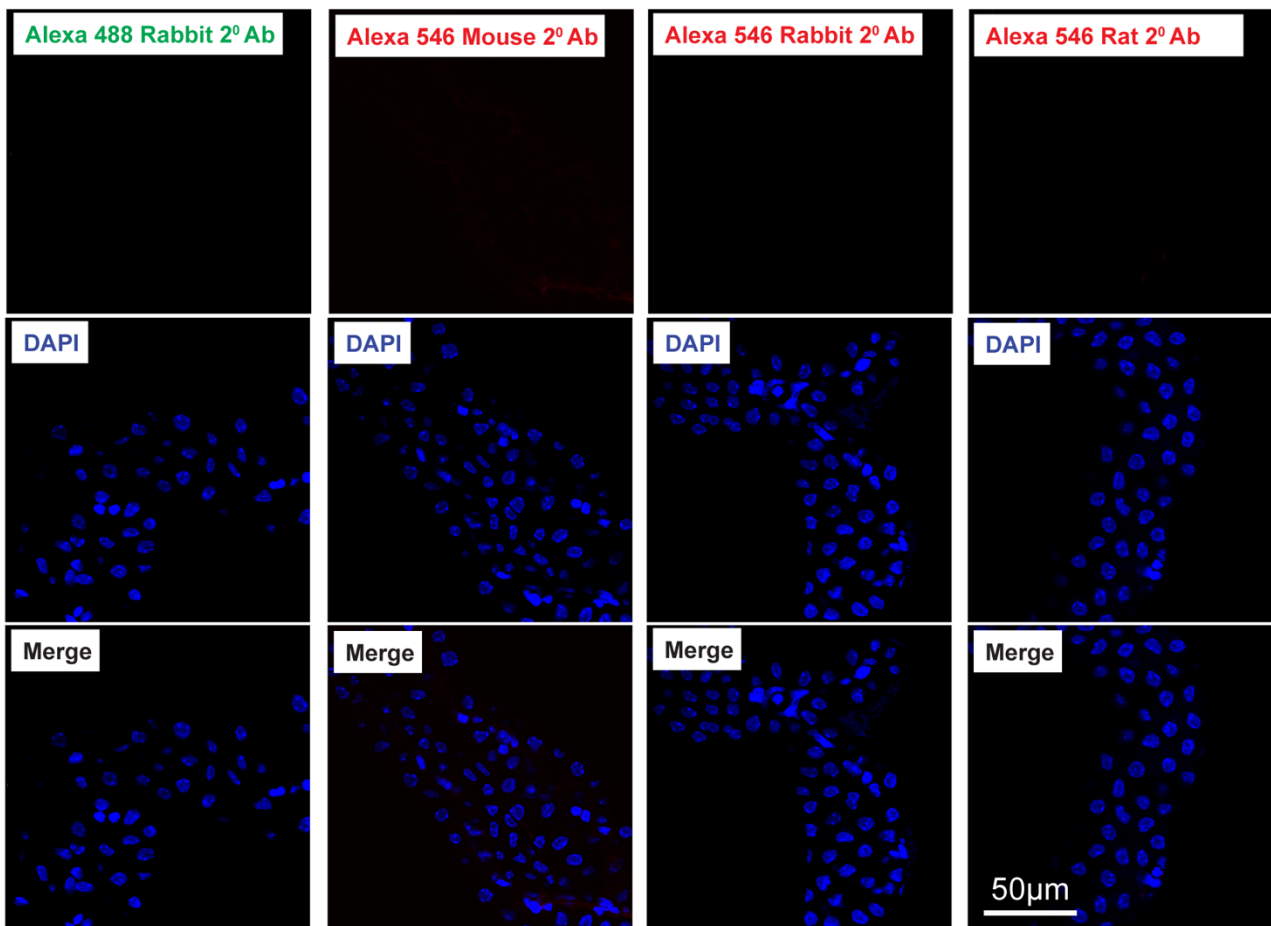

### Supplementary Figure 1. Immunostaining negative control.

Representative images of secondary antibody staining in the mouse LVCP with the following antibodies: Goat anti-rabbit Alexa 488, Goat anti-mouse Alexa 546, Goat anti-rabbit Alexa 546 and Goat anti-rat Alexa 546 at 1:200, images were taken under a 40x oil-immersion objective with identical setting.

Supplementary Figure 2

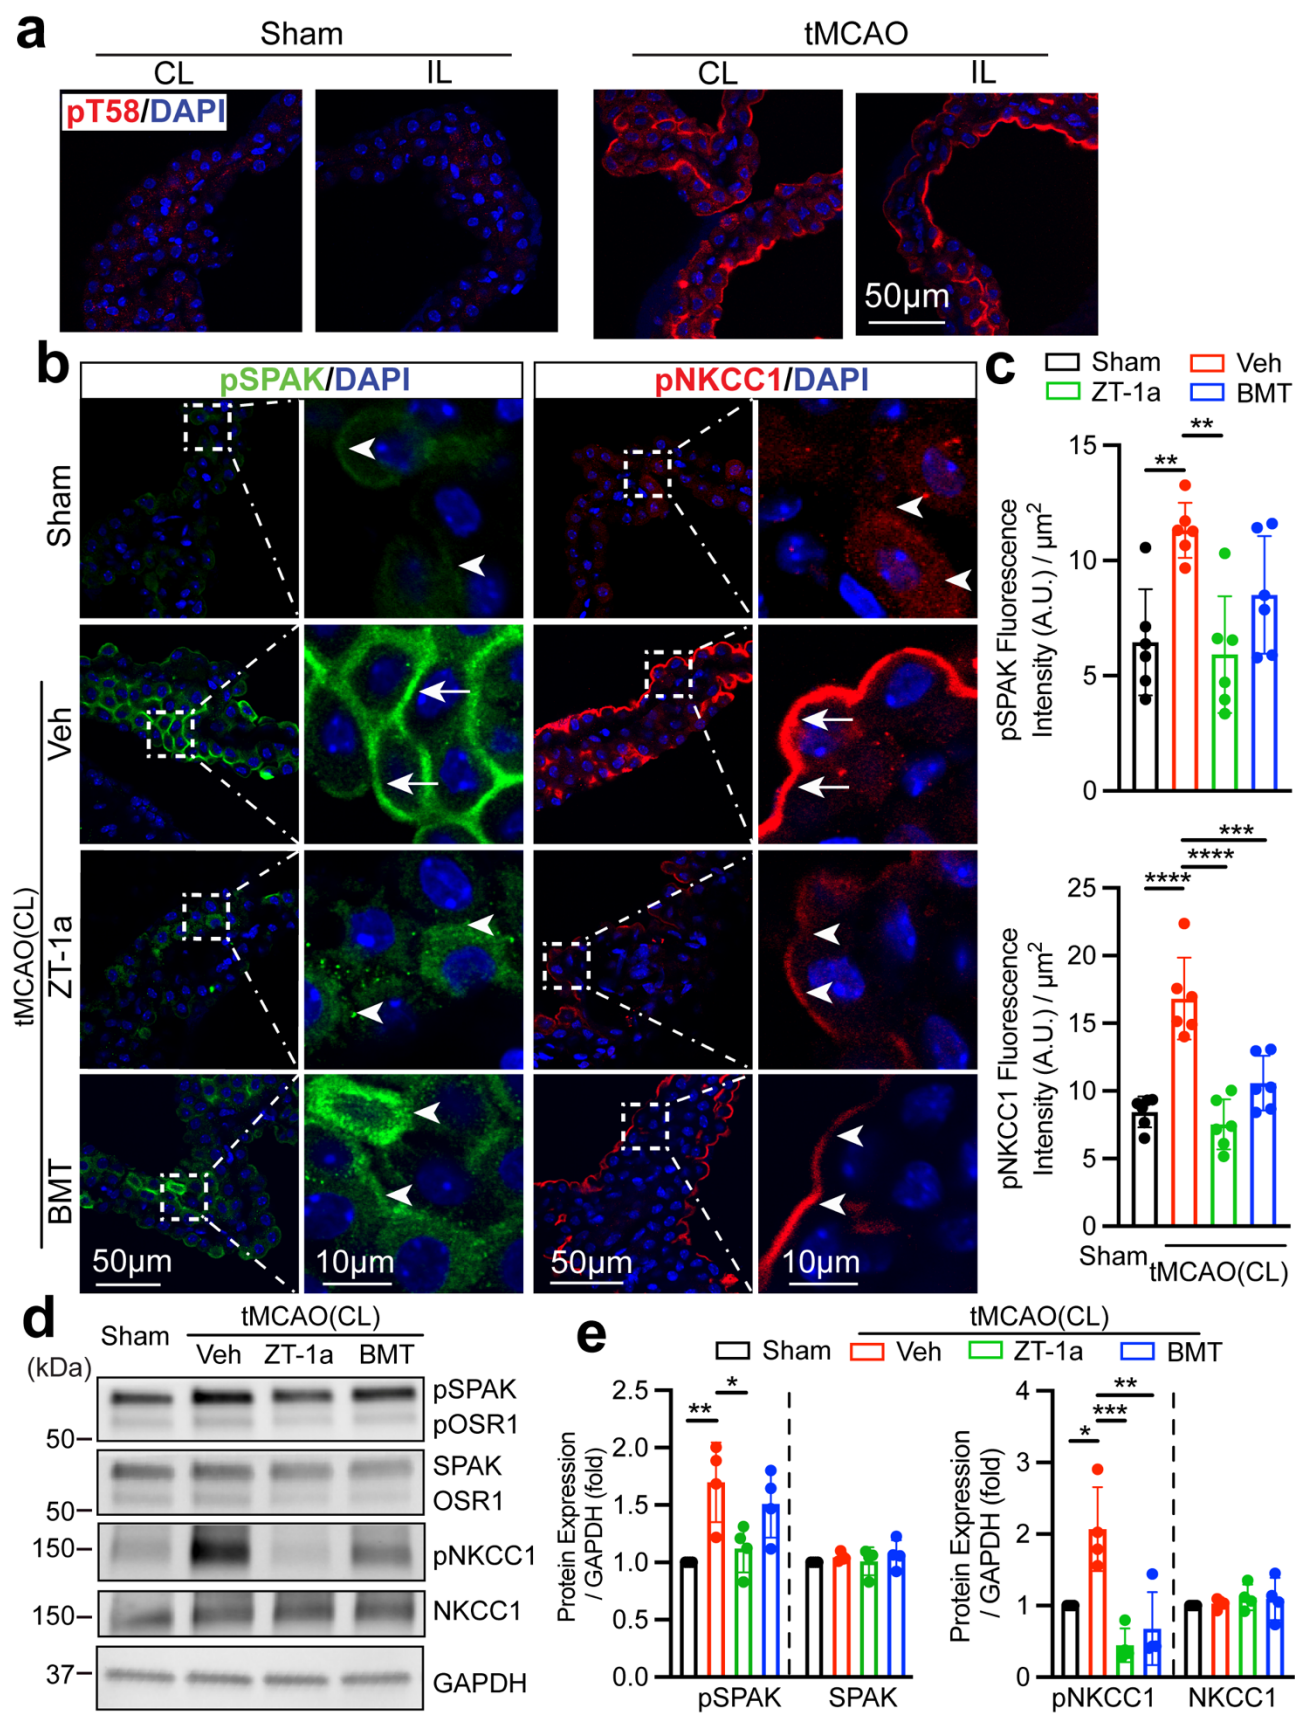

**Supplementary Figure 2. Activation of SPAK-NKCC1 complex in choroid plexus post ischemic stroke.**

**a.** Representative immunostaining images of a phosphorylated species (active) of pT58 in Sham or stroke ChP. **b.** Representative immunofluorescent images of pSPAK and pNKCC1 staining of lateral ventricle choroid plexus (LVCP) in the contralateral (CL) hemispheres in Sham, stroke Veh-control, ZT-1a or BMT-treated brains. Arrowheads: low level pSPAK and pNKCC1 expression. Arrows: elevated pSPAK or pNKCC1 expression. **c.** Quantification summary. Data is represented by mean  $\pm$  SD (n = 6, 4 male, 2 female),  $**p < 0.01$ ,  $***p < 0.001$ ,  $****p < 0.0001$ . The Sham pSPAK and pNKCC1 data in panel **c** are the same as the Sham data presented in **Fig 3e**. **d.** Western blot analysis of SPAK-NKCC1 cascade expression in the CL of LVCP in Sham, Veh-control, ZT-1a- or BMT-treated mice at 24 h Rp after ischemic stroke. ChP tissue lysates were prepared and subjected to immunoblotting with the indicated antibodies. **e.** Immunoblot summary in ChP. Data are expressed as mean  $\pm$  SD (n = 4, 2 male, 2 female).  $*p < 0.05$ ,  $**p < 0.01$ ,  $***p < 0.001$ . One-way ANOVA.

Supplementary Figure 3

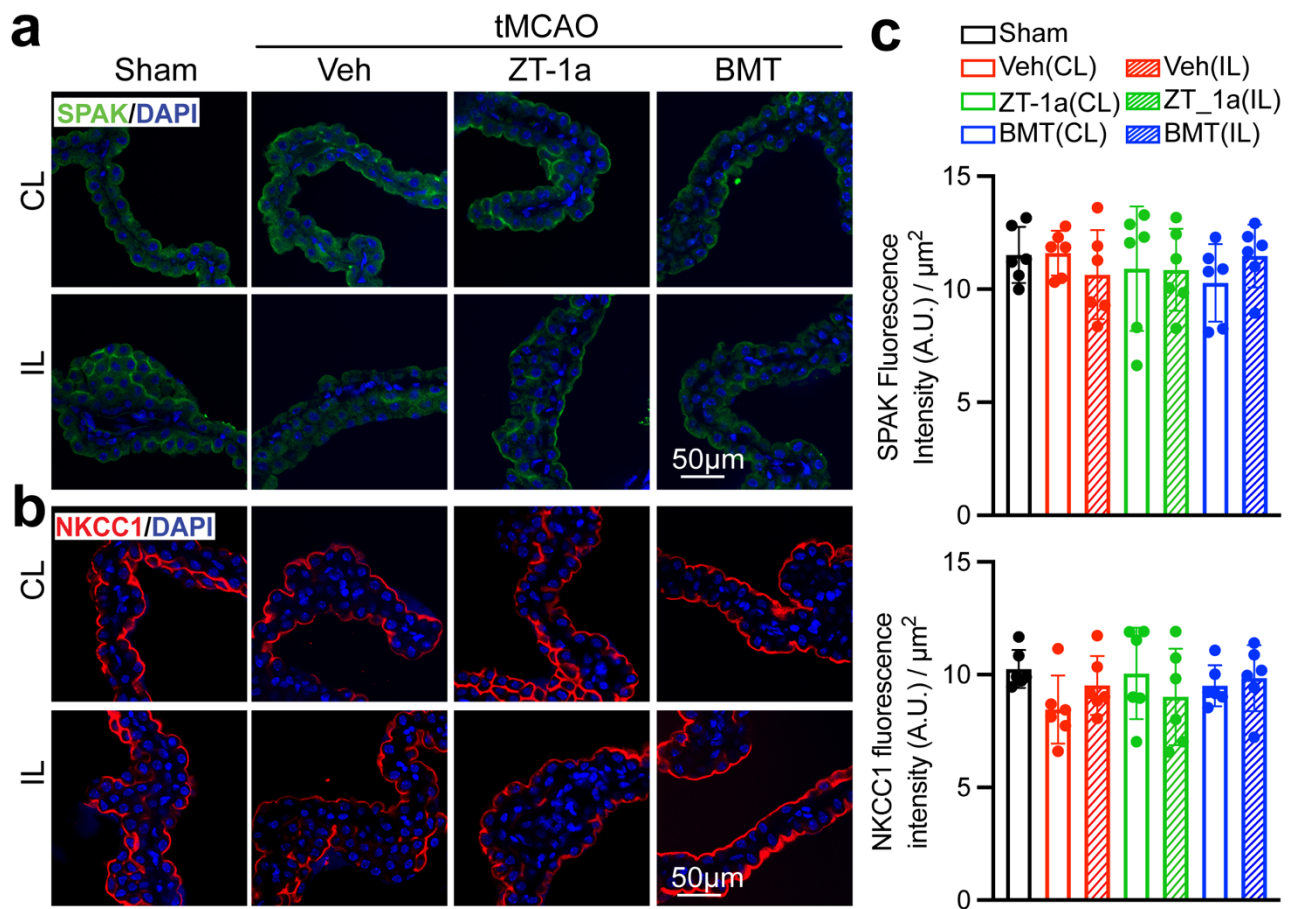

Supplementary Figure 3. Pharmacology block SPAK-NKCC1 cascade restore SPAK protein expression at the apical membrane of CPECs.

**a** and **b**. Representative confocal images of SPAK and NKCC1 protein expression in the contralateral (CL) and ipsilateral (IL) of lateral ventricle choroid plexus (LVCP) post-stroke. **c**. Summary data of SPAK and NKCC1 fluorescence intensity. Data is represented as mean  $\pm$ SD (n = 6, 4 male, 2 female).



Supplementary Figure 4

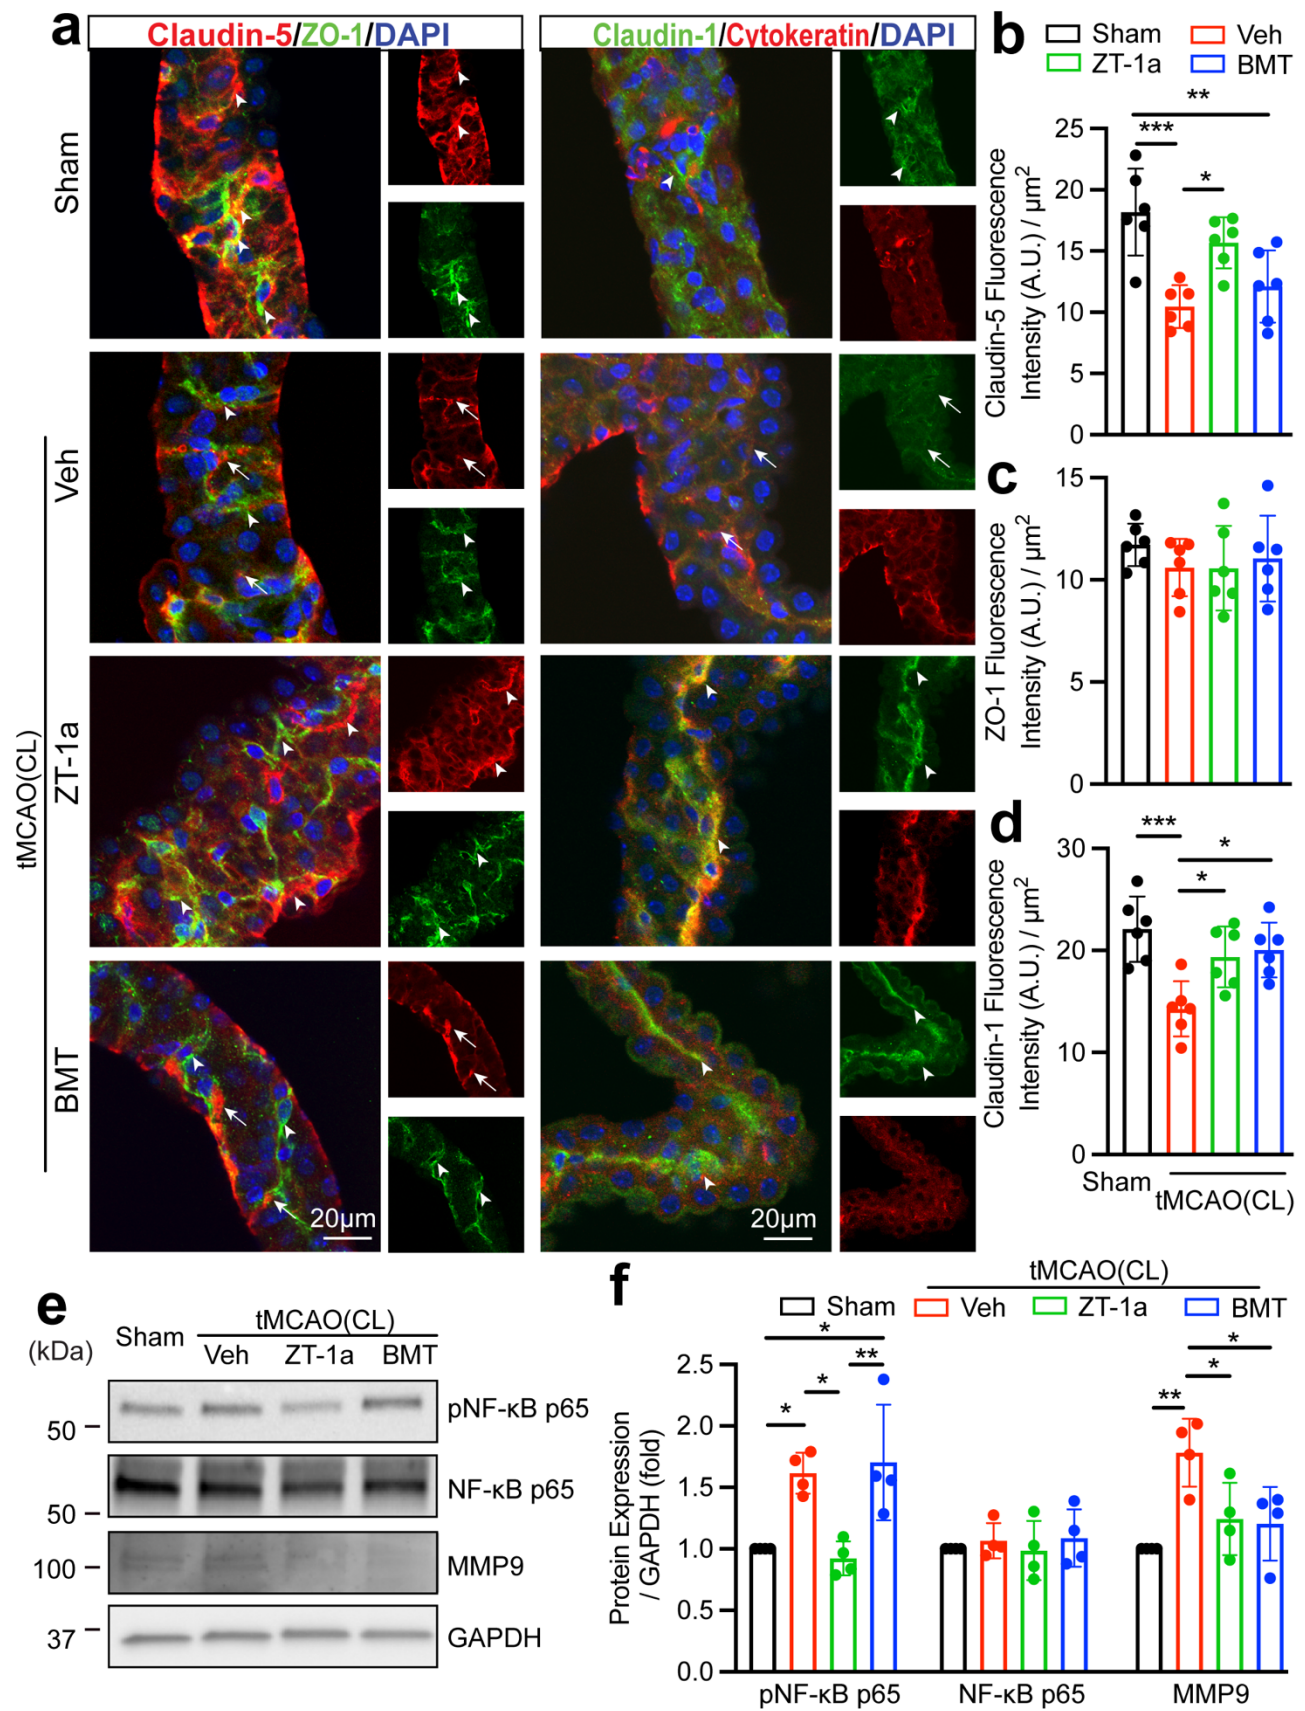

**Supplementary Figure 4. Blocking SPAK-NKCC1 cascade increased ChP tight junction integrity after ischemic stroke.**

**a.** Representative confocal images of tight junction proteins (Claudin-5, ZO-1, Claudin-1) as well as the epithelial marker cytokeratin in the lateral ventricle choroid plexus (LVCP) of contralateral (CL) hemispheres of in Sham, stroke Veh-control, ZT-1a- or BMT-treated brains. Arrowheads: expression of Claudin-5, ZO-1 or Claudin-1. Arrows: Low level expression of Claudin-5 and Claudin-1. The Sham data in panel **b - d** are the same as the Sham data represented in **Fig. 4b - d**. Data are represented as mean  $\pm$ SD (n = 6, 4 male, 2 female). \* $p$  < 0.05, \*\* $p$  < 0.01, \*\*\* $p$  < 0.001. **e.** Western blot analysis of pNF-Kb, NF- $\kappa$ B and MMP9 protein expression in the CL LVCP of Sham, stroke Veh-control, ZT-1a- and BMT-treated mice at 24 h reperfusion after stroke. ChP tissue lysates were prepared and subjected to immunoblotting with the indicated antibodies. **f.** Immunoblot quantitation. Data are means  $\pm$  SD (n = 4, 2 male, 2 female). \* $p$  < 0.05, \*\* $p$  < 0.01, \*\*\* $p$  < 0.001. One-way ANOVA.



Supplementary Figure 5

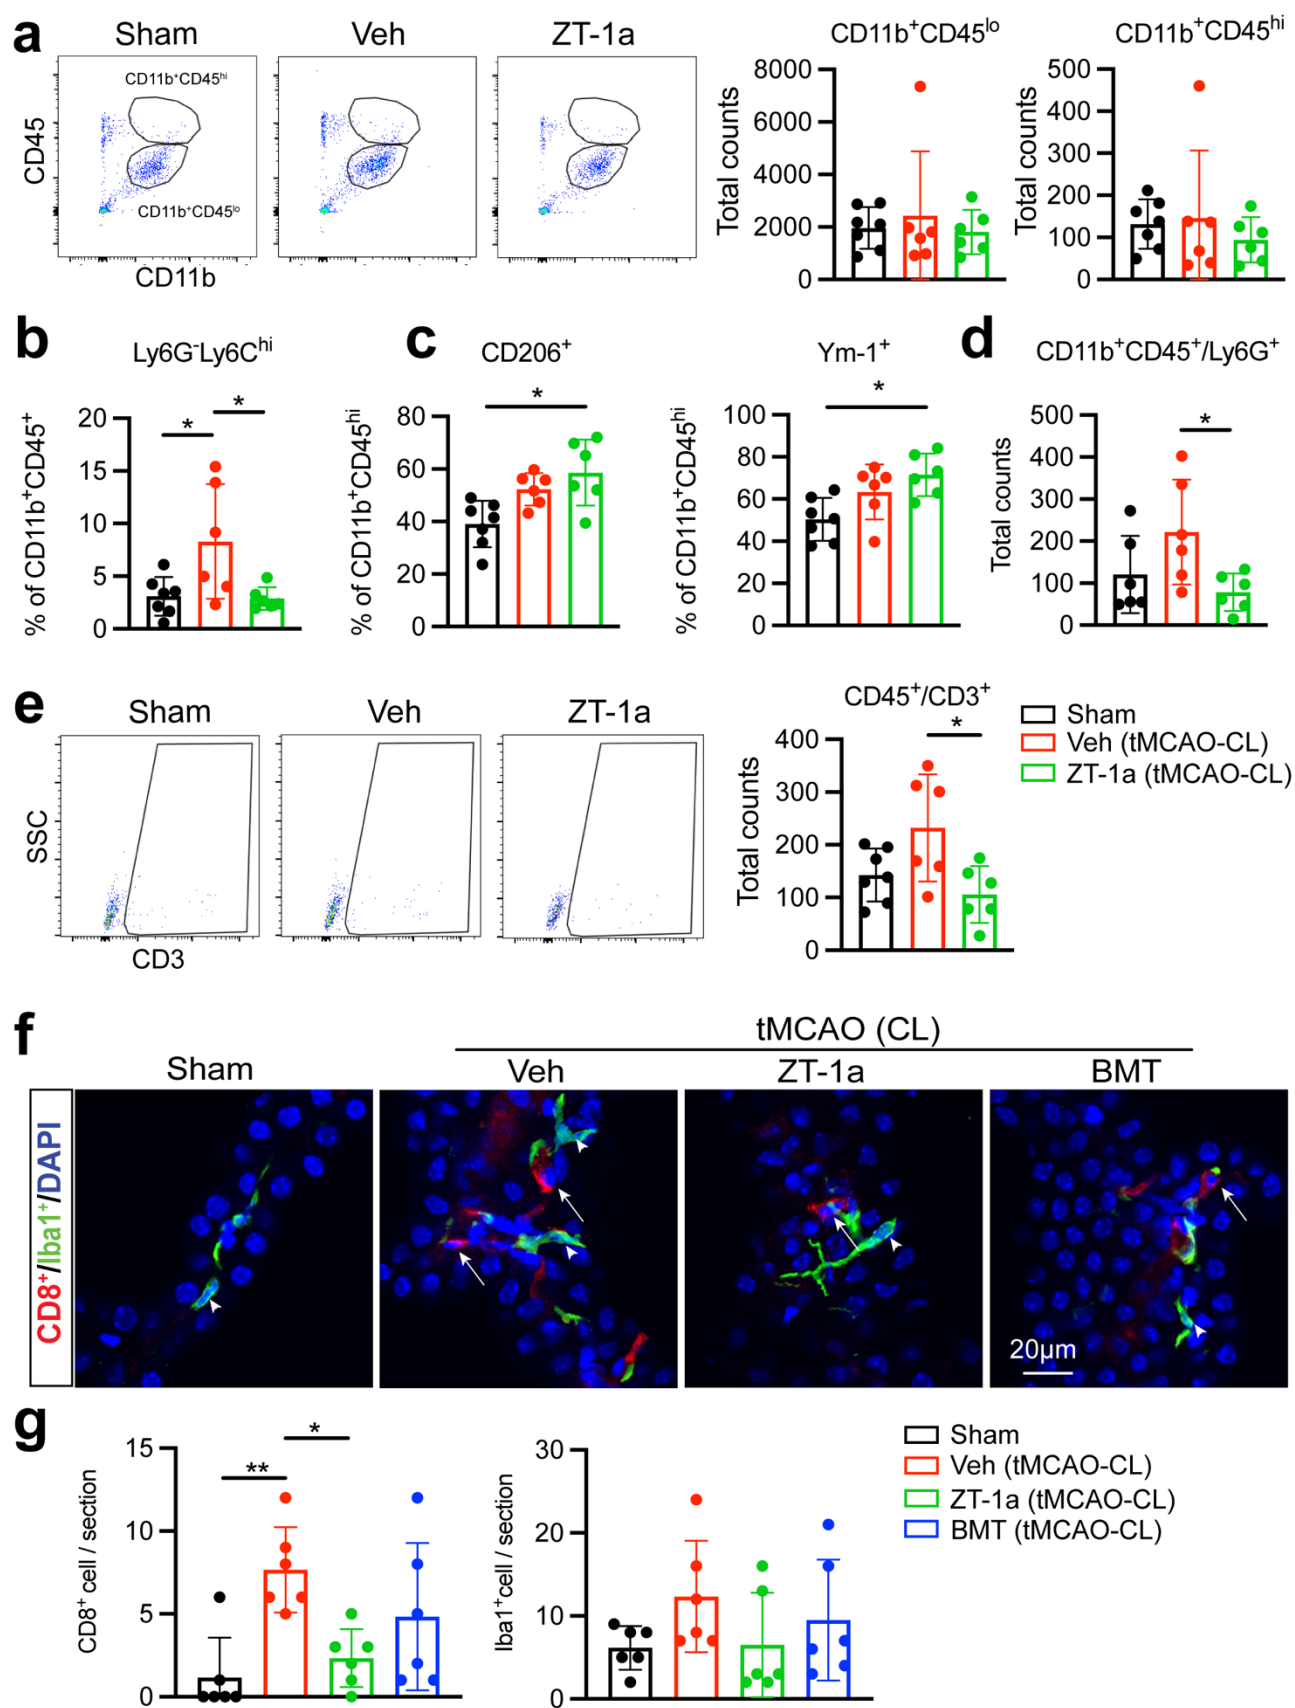

**Supplementary Figure 5. Pharmacological inhibition of SPAK-NKCC1 cascade reduced immune cell infiltration in ChP.**

**a.** Representative flow cytometric plots of CD11b<sup>+</sup>CD45<sup>lo</sup> or CD11b<sup>+</sup>CD45<sup>hi</sup> myeloid cells from the isolated CL ChP at 3 d post-surgery with quantification of total number of CD11b<sup>+</sup>CD45<sup>lo</sup> or CD11b<sup>+</sup>CD45<sup>hi</sup> myeloid cells in the ChP. **b** and **c.** Percentage of CD11b<sup>+</sup>CD45<sup>+</sup>Ly6G<sup>-</sup>Ly6C<sup>hi</sup> and CD206<sup>+</sup> and Ym-1<sup>+</sup> cells gated within CD11b<sup>+</sup>CD45<sup>+</sup> cells. **d.** Total number of CD11b<sup>+</sup>CD45<sup>+</sup>Ly6G<sup>+</sup> neutrophils in the ChP. **e.** Representative flow cytometric plots and the total number of CD3<sup>+</sup> T cells in the ChP. Data are mean  $\pm$  SD (n = 6-7). \*p < 0.05. One-way ANOVA. **f.** Representative images of CD8<sup>+</sup> T cells (arrows) and Iba1<sup>+</sup> microglia cells (arrowheads) of CL LVCP in Sham, stroke Veh-control, ZT-1a- or BMT-treated stroke mice at 24 h Rp. **g.** Summary. Data are mean  $\pm$  SD (n=6, 4 male, 2 female). \*p < 0.01, \*\*p < 0.001. One-way ANOVA.
